# Supplementary material
Source: Royal Society of Chemistry journal article supplement (https://www.rsc.org/suppdata/cc/1999/2475/906144d.doc)
Supplement: Supplementary file 1 [file 906144d.doc]

**Supplementary data**

**Cyclic metallopeptides cyclo[Gly-L-Cys(terpyPtII)]*n*Cl*n***

Kentaro Tanaka,*a*† Kazuki Shigemori*b* and Mitsuhiko Shionoya**a*†

*a Coordination Chemistry Laboratories, Institute for Molecular Science, Myodaiji, Okazaki 444-8585, Japan*

*b Graduate University for Advanced Studies, Myodaiji, Okazaki 444-8585, Japan*

† Present address: Department of Chemistry, School of Science, the University of Tokyo, Hongo, Bunkyo-ku, Tokyo 113-0033, Japan, e-mail: shionoya@chem.s.u-tokyo.ac.jp

# Experimental

**General.** Peptides were synthesized using H-Cys(Trt)-2-ClTrt resin (04-12-2811, Novabiochem) on a peptide synthesizer (Model 433A, PE Applied Biosystems). Peptide cartridges (Fmoc-L-Cys(Trt) and Gly) and reagents for the synthesis were purchased from PE Applied Biosystems. EDT, TFA and CH3CN were purchased from Wako. *t*Bu-Me ether and [terpyPtIICl]Cl·2H2O were purchased from Kanto Chemical and Aldrich, respectively. HOBt (1-hydroxy-1H-benzotriazole monohydrate) and EDC (*N*-ethyl-*N*’-(3-(dimethylamino)propyl)carbodiimide hydrochloride) were purchased from Dojindo Laboratories. HPLC was performed using TSK-gel 80Ts (21.5 mmID x 30 cm, TOSO, eluent. 0.1 % TFA, H2O-CH3CN = 7:3, flow rate 5 mL/min, 25 °C). Membrane filter (pore size 0.45 m) was purchased from Millipore.

1H NMR spectra were recorded on a JEOL Lambda 500 (500 MHz for 1H) spectrometer. The spectra are referenced to TSP in D2O or 20% CD3CO2D/D2O. Chemical shifts () are reported in ppm; multiplicities are indicated by: s (singlet), d (doublet), dd (doublet of doublet), ddd (doublet of doublet of doublet), m (multiplet), and br (broad). Coupling constants, *J*, are reported in Hz. Electrospray ionization (ESI) mass spectra were recorded on a PE SCIEX API-300 spectrometer.

**H2-[-Gly-L-Cys(terpyPtII)-]3-OH·(CF3CO2)4·14H2O (1a).** H2-[Gly-L-Cys(Trt)]3-OH·(CF3CO2) was synthesized on the peptide synthesizer using standard Fmoc chemistry on a 0.25 mmol scale. After removing from the resin and deprotection, the clude peptide was purified by HPLC. Appropriate fractions (retention time: 17–19 min) were collected and lyophilized to obtain 115 mg (0.19 mmol, 63%) of H2-(Gly-L-Cys)3-OH·(CF3CO2) as colorless solid. To a solution of H2-(Gly-L-Cys)3-OH·(CF3CO2) (21.7 mg, 35.4 mol) in H2O (2 mL) was added a solution of [(terpyPtII)Cl]Cl·2H2O (68.2 mg, 127.4 mol) in H2O (0.5 mL). The mixture was stirred at room temperature for 5 h. The crude product was purified by HPLC (0.1% TFA, H2O-CH3CN (7:3)) twice and lyophilized to obtain H2-[Gly-L-Cys(terpyPtII)]3-OH·(CF3CO2)4·14H2O (77.5 mg, 31.2 mol, 88%) as red solid. 1H NMR (D2O, 30 °C):  2.76 (dd, *J* = 5.7, 12.8 Hz, 1H), 2.83 (dd, *J* = 4.3, 12.6 Hz, 1H), 3.04 (d, *J* = 5.6 Hz, 2H), 3.18 (dd, *J* = 7.3, 11.5 Hz, 1H), 3.45 (dd, *J* = 6.1, 11.5 Hz, 1H), 3.83 (d, *J*= 17.6 Hz, 1H), 3.87 (d, *J*= 16.9 Hz, 1H), 3.94 (d, *J*= 16.2 Hz, 1H), 4.05 (d, *J*= 17.1 Hz, 1H), 4.12 (d, *J*= 17.1 Hz, 1H), 4.27 (d, *J*= 17.3 Hz, 1H), 4.40 (dd, *J*= 5.0, 5.0 Hz, 1H), 4.50 (dd, *J* = 6.7, 6.7 Hz, 1H), 4.54 (t, *J*= 5.6 Hz, 1H), 7.55 (dd, *J* = 6.6, 6.6 Hz, 1H), 7.59 (dd, *J* = 6.6, 6.6 Hz, 1H), 7.64 (dd, *J* = 6.6, 6.6 Hz, 1H), 7.71 (d, *J* = 7.6 Hz, 2H), 7.77 (d, *J* = 8.6 Hz, 2H), 7.79 (d, *J* = 9.6 Hz, 2H), 7.82 (d, *J* = 8.1 Hz, 2H), 7.90 (d, *J* = 7.9 Hz, 2H), 8.01 (d, *J* = 8.1 Hz, 2H), 8.05-8.13 (m, 8H), 8.29 (t, *J* = 7.9 Hz, 1H), 8.58 (d, *J* = 5.4 Hz, 2H), 8.62 (br, 2H), 8.97 (d, *J* = 5.6 Hz, 2H). MS (ESI): *m/z* (Calcd) 593 (593, [M]3+), 889 (889, [M – H+]2+). Anal. Calcd for C68H85F12N15O29Pt3S3: C, 32.85; H, 3.44; N, 8.45. Found: C, 32.65; H, 3.00; N, 8.59.

***Cyclo*[-Gly-L-Cys(terpyPtII)-]3·Cl3·11H2O (2).** To a solution of H2-[Gly-L-Cys(terpyPtII)]3-OH ·(CF3CO2)4·14H2O (10 mg, 4.0 mol) in H2O (5.5 mL) was added a solution of HOBt (6.1 mg, 40 mol) in CH3CN (2.4 mL) and a solution of EDC (25.6 mg, 133 mol) in H2O (0.1 mL). The mixture was stirred at 25 °C. Solutions of EDC (25.6 mg, 133 mol) in H2O (0.1 mL) were added twice to the mixture at 12 h intervals. After stirring for 48 h in total, red powder precipitated was collected with a membrane filter and dried *in vacuo* to obtain **2** (4.7 mg, 2.3 mol, 58%).1H NMR (D2O, 60 °C):  3.13 (dd, *J* = 6.4, 12.2 Hz, 3H), 3.28 (dd, *J* = 5.3, 12.3 Hz, 3H), 3.88 (d, *J* = 17.9 Hz, 3H), 4.24 (d, *J*= 17.1 Hz, 3H), 4.61 (dd, *J* = 5.6, 5.6 Hz, 3H), 7.70 (dd, *J* = 6.6, 6.6 Hz, 6H), 7.96 (d, *J* = 7.8 Hz, 6H), 8.02 (d, *J* = 7.8 Hz, 6H), 8.14 (dd, *J* = 7.8, 7.8 Hz, 6H), 8.21 (t, *J* = 7.9 Hz, 3H), 8.98 (d, *J* = 5.2 Hz, 6H). MS (ESI): *m/z* (Calcd) 587 (587, [M]3+), 667 (667, [M – terpyPtII + H+]2+). Anal. Calcd for C60H76Cl3N15O17Pt3S3: C, 34.86; H, 3.71; N, 10.16. Found: C, 35.13; H, 3.41; N, 9.83.

**H2-[Gly-L-Cys(terpyPtII)]4-OH·(CF3CO2)5·18H2O (1b).** H2-[Gly-L-Cys(Trt)]4-OH·(CF3CO2) was synthesized in the same scale as **1a**. The precipitate similarly obtained was purified by HPLC (0.1% TFA, H2O-CH3CN (7:3)). Appropriate fractions (retention time: 18.5–19.5 min) were collected and lyophilized to obtain H2-(Gly-L-Cys)4-OH·(CF3CO2) (80 mg, 0.10 mmol, 40%). To a solution of H2-(Gly-L-Cys)4-OH·(CF3CO2) (7.2 mg, 9.3 mol) in H2O (1.0 mL) was added a solution of [(terpyPtII)Cl]Cl·2H2O (23.9 mg, 44.6 mol) in H2O (0.2 mL). The mixture was stirred at room temperature for 24 h. The mixture was purified by HPLC (0.1% TFA, H2O-CH3CN (7:3)) and lyophilized to obtain H2-[Gly-L-Cys(terpyPtII)]4-OH ·(CF3CO2)5·18H2O as red solid (29.4 mg, 9.0 mol, 97%). 1H NMR (D2O, 30 °C):  2.75 (dd, *J* = 4.7, 13.2 Hz, 1H), 2.88 (dd, *J* = 3.9, 13.0 Hz, 1H), 2.95 (dd, *J* = 5.6, 13.0 Hz, 1H), 3.01 (dd, *J* = 4.9, 12.9 Hz, 1H), 3.29-3.39 (m, 3H), 3.52 (dd, *J* = 4.5, 12.1 Hz, 1H), 3.75 (d, *J*= 17.4 Hz, 1H), 3.85 (d, *J*= 16.4 Hz, 1H), 3.91 (d, *J*= 17.1 Hz, 1H), 3.94 (d, *J*= 16.4 Hz, 1H), 4.05 (d, *J*= 17.1 Hz, 1H), 4.11 (d, *J*= 17.1 Hz, 1H), 4.29 (d, *J*= 17.4 Hz, 1H), 4.40 (t, *J*= 4.3 Hz, 1H), 4.49-4.58 (m, 4H), 7.59-7.69 (m, 14H), 7.71 (d, *J* = 8.1 Hz, 2H), 7.84 (d, *J* = 7.8 Hz, 2H), 7.88 (d, *J* = 8.1 Hz, 2H), 7.95 (d, *J* = 7.3 Hz, 2H), 7.99-8.15 (m, 13H), 8.34 (t, *J* = 8.1 Hz, 1H), 8.62 (d, *J* = 5.2 Hz, 2H), 8.76 (d, *J* = 5.1 Hz, 2H), 8.82 (d, *J* = 4.4 Hz, 2H), 8.99 (d, *J* = 4.4 Hz, 2H). MS (ESI): *m/z* (Calcd) 592 (592, [M]4+), 711 (711, [M – H+ – terpy]3+), 789 (789, [M – H+]3+). Anal. Calcd for C90H111F15N20O37Pt4S4: C, 33.17; H, 3.43; N, 8.60. Found: C, 32.84; H, 2.89; N, 9.04.

***Cyclo*[-Gly-L-Cys(terpyPtII)-]4·Cl4·17H2O (3).** Toa solution of H2-[Gly-L-Cys(terpyPtII)]4-OH·(CF3CO2)5·18H2O (17.9 mg, 5.5 mol) in H2O (8.4 mL) was added a solution of HOBt (9.3 mg, 61 mol) in CH3CN (3.66 mL) and a solution of EDC (38.9 mg, 203 mol) in H2O (0.14 mL). The mixture was stirred at 25 °C. A solution of EDC (38.9 mg, 203 mol) in H2O (0.1 mL) was added five times to the mixture at 12 h intervals. After stirring for 72 h in total, the appeared precipitate was collected with a membrane filter and dried *in* *vacuo* and to obtain **3** (9.0 mg, 3.2 mol, 58%).1H NMR (D2O, 60 °C):  2.88 (dd, *J* = 6.5, 12.3 Hz, 4H), 3.23 (dd, *J* = 5.5, 12.3 Hz, 4H), 3.92 (d, *J* = 17.1 Hz, 4H), 4.07 (d, *J*= 17.1 Hz, 4H), 4.56 (dd, *J* = 6.5, 6.5 Hz, 4H), 7.68 (dd, *J* = 6.5, 6.5 Hz, 8H), 7.94 (d, *J* = 7.9 Hz, 8H), 8.02 (d, *J* = 6.6 Hz, 8H), 8.12 (dd, *J* = 7.6, 7.6 Hz, 8H), 8.27 (t, *J* = 8.3 Hz, 4H), 8.91 (d, *J* = 5.4 Hz, 8H). The 1H NMR spectrum includes a set of unidentified small peaks which may be assignable to those for a conformational isomer. The HPLC analysis of the product showed a highly symmetrical single peak, and even after any purification no change was observed in the NMR chart at all. MS (ESI): *m/z* (Calcd) 587 (587, [M]4+), 640 (640, [M – terpyPtII + H+]3+), 783 (783, [M – H+]3+). Anal. Calcd for C80H106Cl4N20O25Pt4S4: C, 34.34; H, 3.82; N, 10.01. Found: C, 34.11; H, 3.52; N, 9.92.
